# Supplementary material for: On the nature of metallic nanoparticles obtained from molecular Co3Ru–carbonyl clusters in mesoporous silica matrices
Source: Royal Society of Chemistry journal article supplement (doi:10.1039/b603404g), 2006-01-01
Supplement: b603404g.pdf [file b603404g.pdf]

## On the nature of metallic nanoparticles obtained from molecular $\text{Co}_3\text{Ru}$ -carbonyl clusters in mesoporous silica matrices.

Fanny Schweyer-Tihay<sup>a,b,c,†</sup>, Claude Estournès,<sup>a,\*,★</sup> Pierre Braunstein,<sup>b,\*</sup> Jean Guille,<sup>a</sup>  
Jean-Louis Paillaud,<sup>c,\*</sup> Mireille Richard-Plouet,<sup>a,□</sup> and Jacky Rosé<sup>b</sup>

Supporting Information

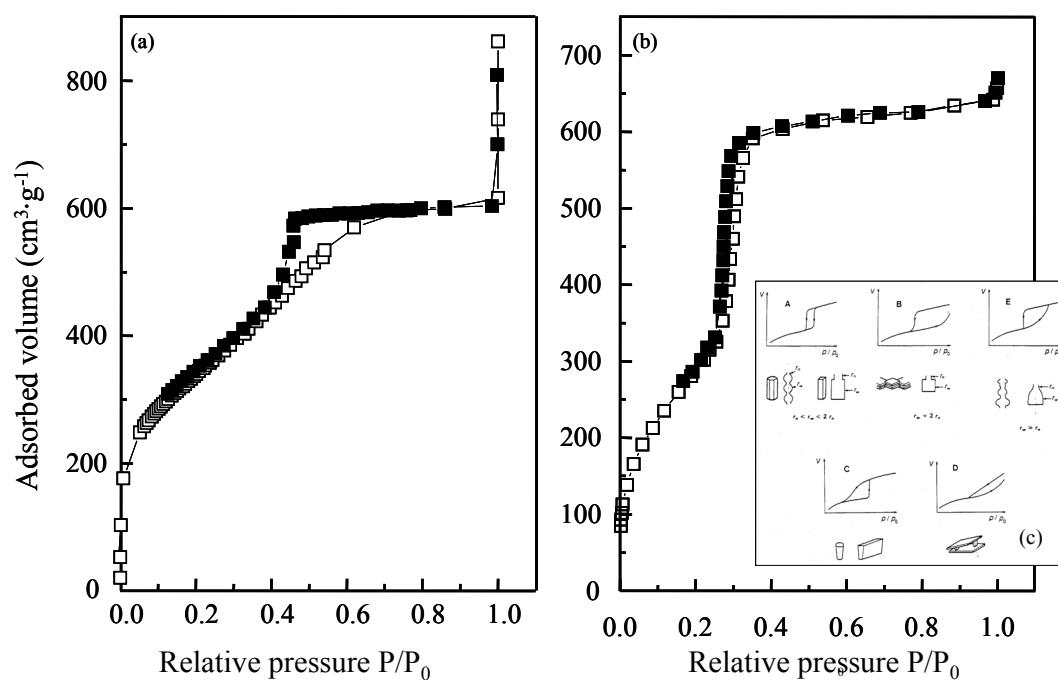

Figure S-1. Adsorption (□) and desorption (■) isotherms of a xerogel (a) and MCM-41 (b).

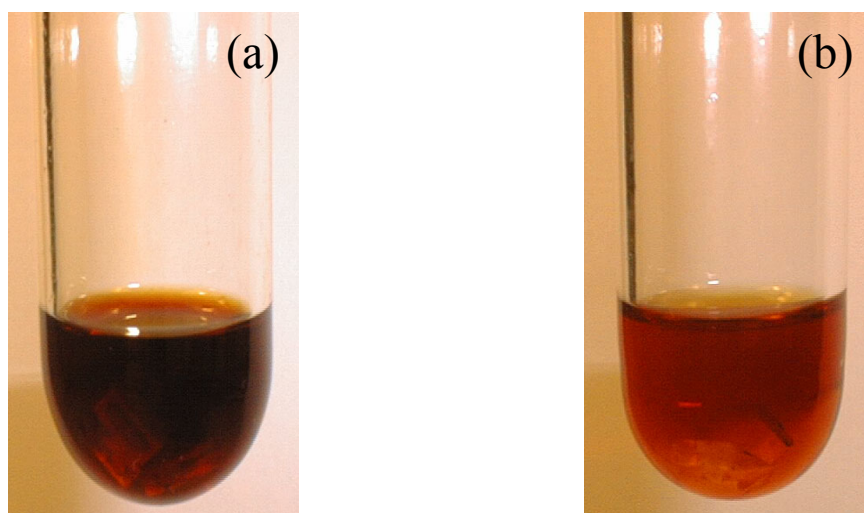

Figure S-2. Silica monoliths immersed into a  $10^{-3} \text{ mol} \cdot \text{l}^{-1}$  solution of  $\text{NEt}_4[\text{Co}_3\text{Ru}(\text{CO})_{12}]$  after (a) :  $t = 0 \text{ h}$  and (b)  $t = 24 \text{ h}$ .

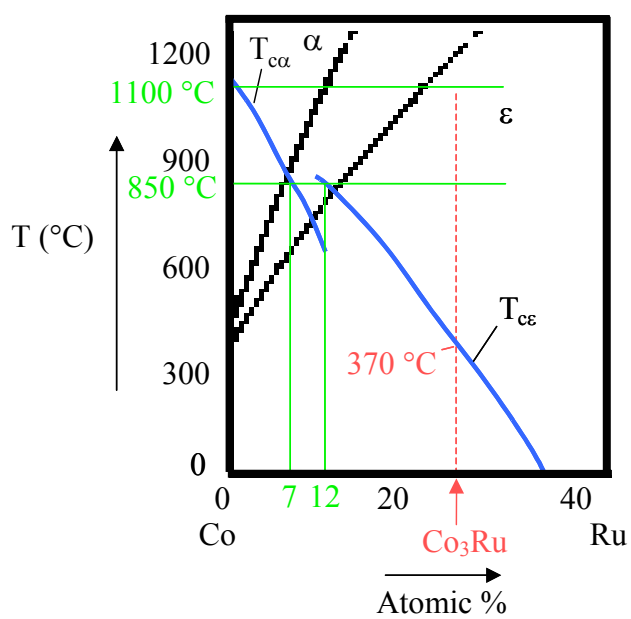

Figure S-3. Co-Ru phase diagram (between 0 and 40 atom. % of Ru) <sup>75</sup>.
